# Supplementary material
Source: PubMed Central journal article supplement (PMC3772677)
Supplement: NIHMS455950-supplement-e-table.pdf [file NIHMS455950-supplement-e-table.pdf]

## Supplementary Online Content

Zhang X, Bullard KM, Cotch MF, et al. Association between depression and functional vision loss in persons 20 years of age or older in the United States, NHANES 2005-2008. *JAMA Ophthalmology*. Published online February 14, 2013. doi:10.1001/jamaophthalmol.2013.2597.

### **eTable. Extra Analysis: Crude prevalence of depression by age group in US adults aged $\geq 20$ years: NHANES 2005-2008**

This supplementary material has been provided by the authors to give readers additional information about their work.

**eTable. Extra Analysis: Crude prevalence<sup>1</sup> of depression<sup>2</sup> by age group in US adults aged ≥20 years: NHANES 2005-2008**

|             | N    | Total Population | Self-report of any visual function problem |                  |
|-------------|------|------------------|--------------------------------------------|------------------|
|             |      |                  | No                                         | Yes              |
| Age (years) |      |                  |                                            |                  |
| 20-39       | 3683 | 6.4 (5.5-7.5)    | 4.7 (3.8-5.8)                              | 13.0 (10.4-16.1) |
| 40-59       | 3264 | 8.4 (7.0-10.1)   | 6.0 (4.7-7.6)                              | 11.5 (9.1-14.4)  |
| ≥60         | 3533 | 5.7 (4.7-7.0)    | 3.0 (2.2-4.1)                              | 9.6 (7.6-12.0)   |

NHANES, National Health and Nutrition Examination Surveys.

<sup>1</sup> Weighted percentages and 95% confidence intervals are presented.

<sup>2</sup> Defined as PHQ-9 score ≥10.
